# Supplementary material for: Antifungal Synergy: Mechanistic Insights into the R-1-R Peptide and Bidens pilosa Extract as Potent Therapeutics against Candida spp. through Proteomics
Source: Preprints.org preprint supplement (doi:10.20944/preprints202407.0462.v1), 2024-07-04
Supplement: Supplementary file 1 [file supplementary]

Supplementary Data

**Table S1.** Measurement of proteins concentration

| **Samples** | **Replica** | **Protein**  **concentration**  **(µg/µL)** | **Sample total volume (µL)** | **Total protein (µg)** |
| --- | --- | --- | --- | --- |
| *C. albicans* SC5314 Basal | **1** | 2,38 | 100 | 238,34 |
| **2** | 3,46 | 100 | 345,61 |
| **3** | 3,29 | 100 | 328,93 |
| **4** | 2,93 | 100 | 292,60 |
| *C. albicans* SC5314 (R-1-R CMI-100 ug/mL) | **1** | 1,66 | 100 | 166,23 |
| **2** | 1,27 | 100 | 127,49 |
| **3** | 1,46 | 100 | 145,97 |
| **4** | 1,44 | 100 | 144,35 |
| *C. albicans* SC5314 (Combination) | **1** | 1,72 | 100 | 171,59 |
| **2** | 1,48 | 100 | 147,76 |
| **3** | 2,06 | 100 | 205,95 |
| **4** | 1,19 | 100 | 118,79 |
| *C. albicans* 256  Basal | **1** | 5,18 | 100 | 518,44 |
| **2** | 3,42 | 100 | 342,04 |
| **3** | 4,52 | 100 | 452,37 |
| **4** | 5,68 | 100 | 567,57 |
| *C. albicans* 256  (R-1-R CMI-100 ug/mL) | **1** | 1,35 | 100 | 134,64 |
| **2** | 1,57 | 100 | 156,69 |
| **3** | 1,24 | 100 | 123,92 |
| **4** | 0,99 | 100 | 99,27 |

**
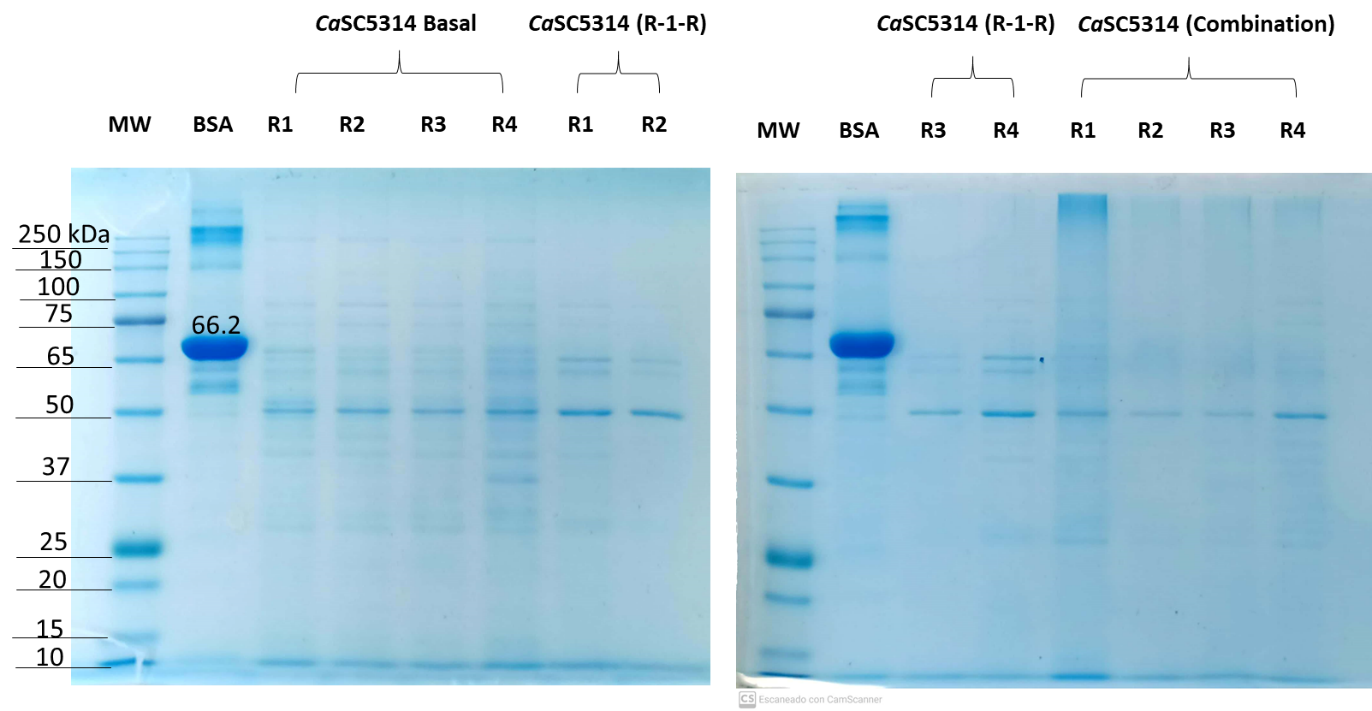
**

| (**a**) | (**b**) |
| --- | --- |

**
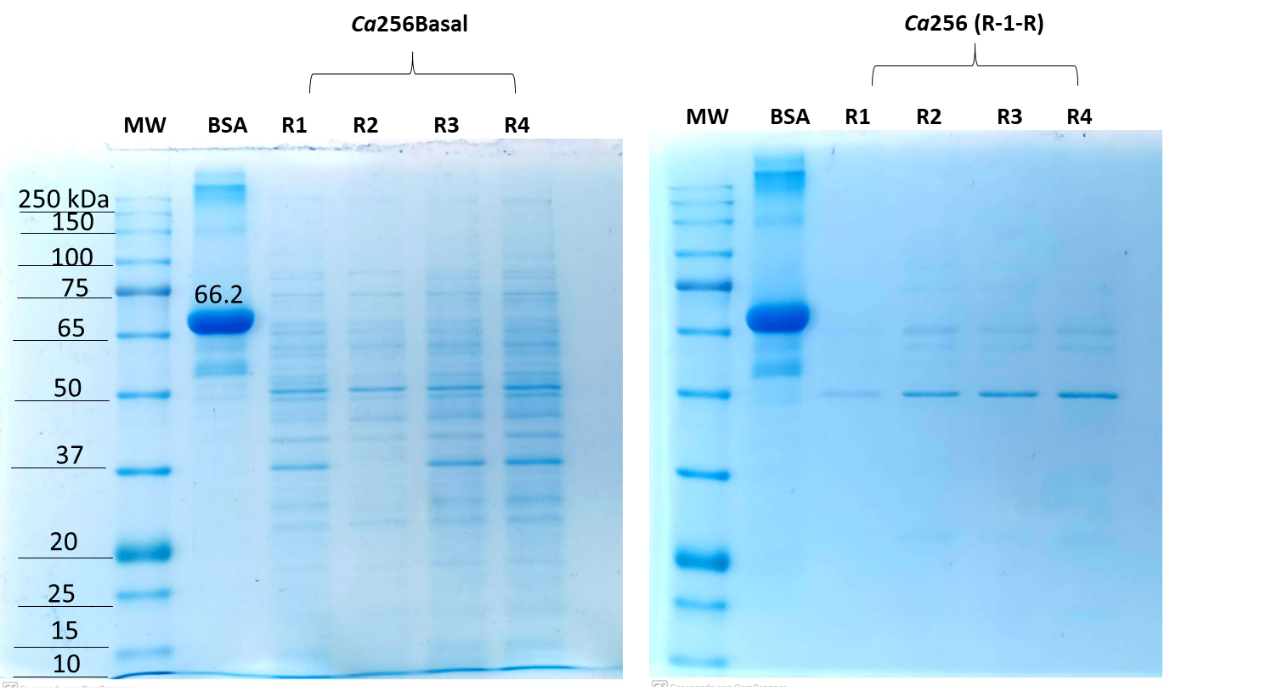
**

| (**c**) | (**d**) |
| --- | --- |

**Figure. S1** The total proteins of drugs-treated (**a**) *C. albicans* SC5314 and (**b**) *C. albicans* 256were separated by SDS-PAGE.MW: Molecular weight, BSA: bovine serum albumin, R: Replica

| **Citation:** To be added by editorial staff during production.  Academic Editor: Firstname Lastname  Received: date  Revised: date  Accepted: date  Published: date  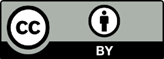  **Copyright:** © 2024 by the authors. Submitted for possible open access publication under the terms and conditions of the Creative Commons Attribution (CC BY) license (https://creativecommons.org/licenses/by/4.0/). |
| --- |
